# Supplementary material
Source: publisher site journal article supplement (https://www.dovepress.com/article/399855)
Supplement: Supplementary file 1 [file get_supplementary_file.php]

## Figure S1 Validation of *Ulk1*KO mice.

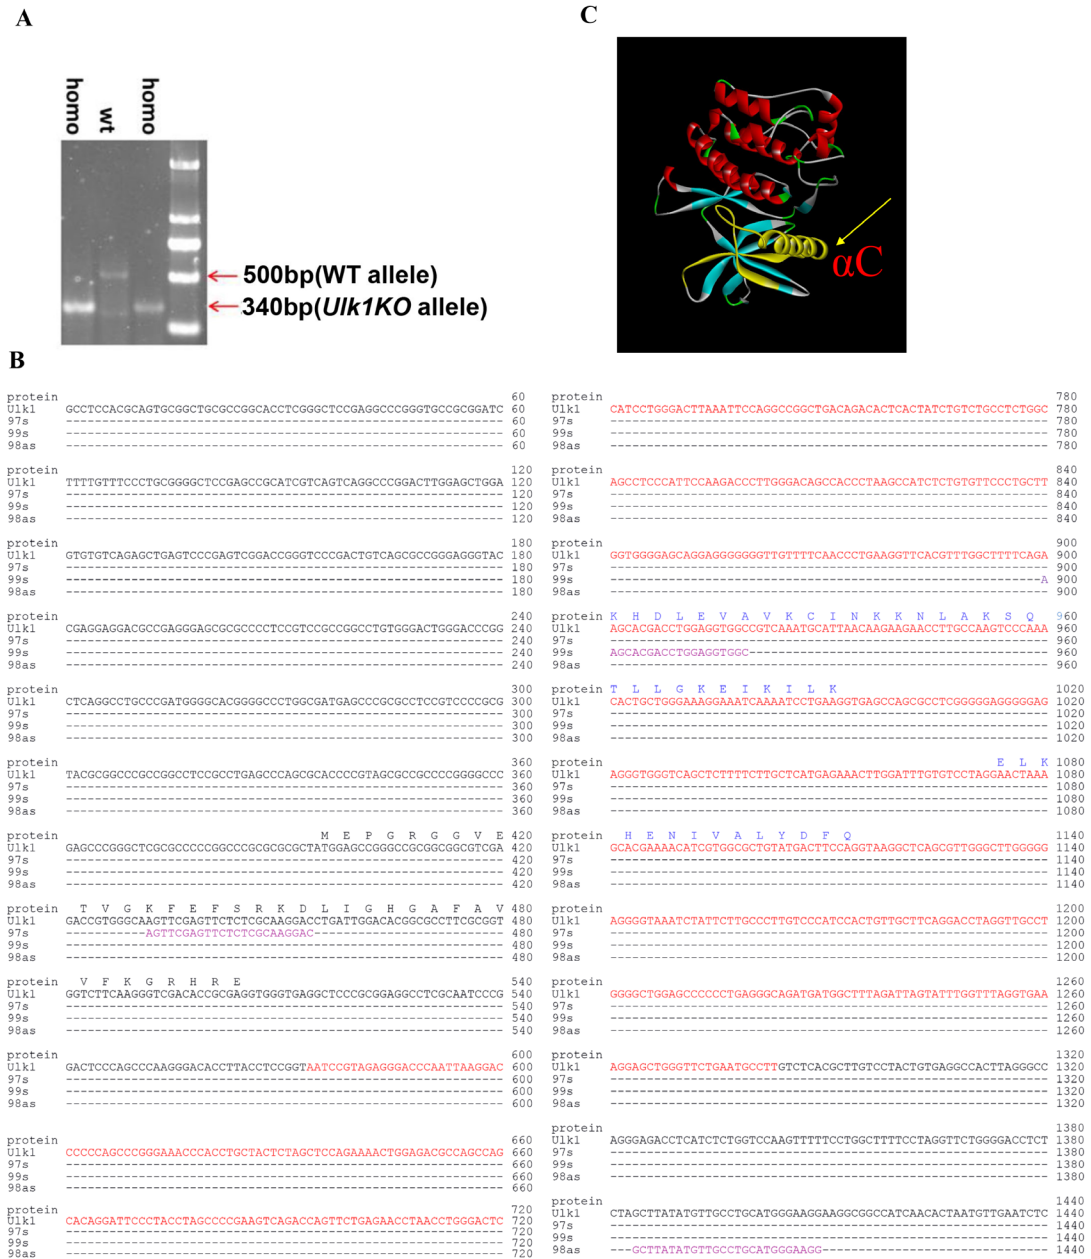

(a) Genotyping of *Ulk1*KO mice by DNA electrophoresis. (b) The red highlight indicates the missing DNA sequence of *Ulk1* gene. (c) The yellow color represents the missing peptides which belong to the  $\alpha$ C domain.

**Figure S2. Analysis of the prognostic value of ULK1 in HCC.**

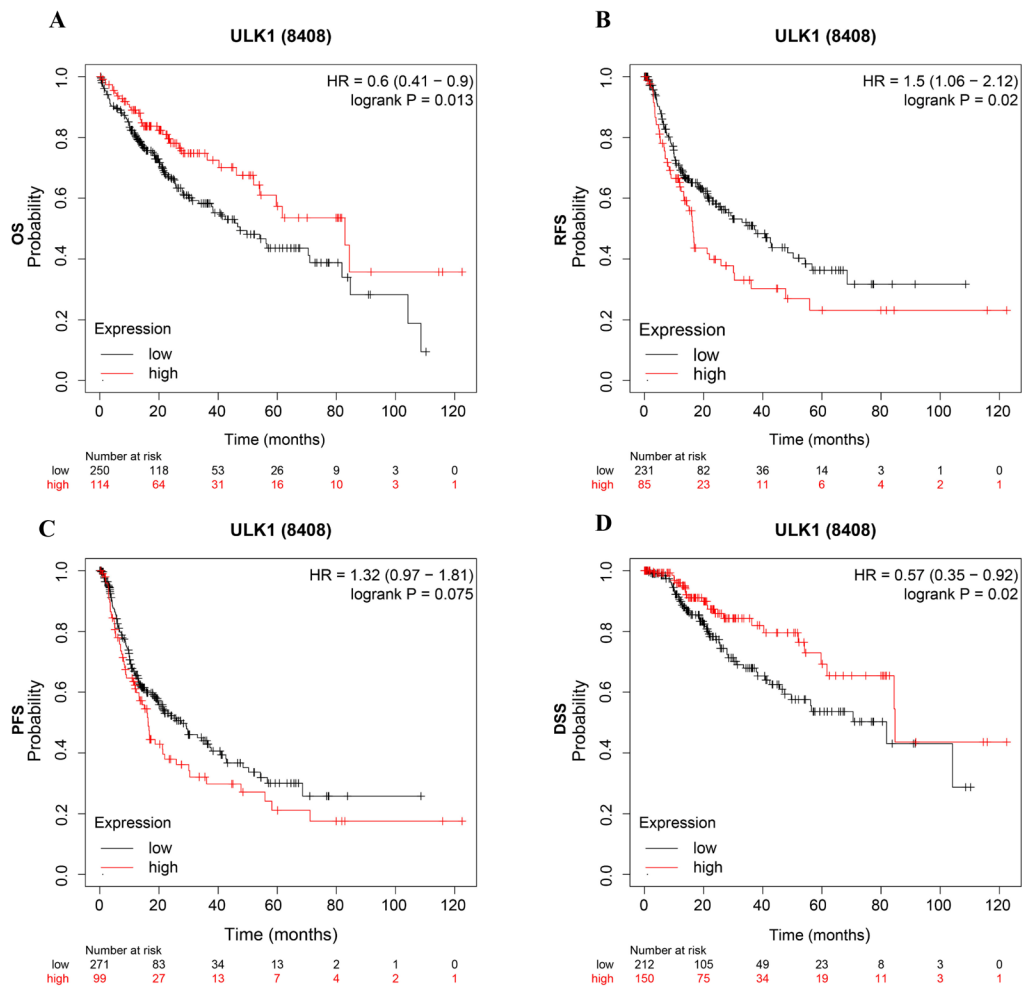

Kaplan-Meier survival analysis for the relationship between survival time and ULK1 signature in liver cancer was performed using the online tool (<http://kmplot.com/analysis/>). (a) OS, Overall Survival; (b) RFS, Relapse-Free Survival; (c) PFS, Progression-Free Survival; (d) DSS, Disease-Specific Survival.  $P < 0.05$  was considered as statistically significant.

**Figure S3. Gene set enrichment analysis (GSEA) of gene expression profile in *Ulk1*KO mice liver.**

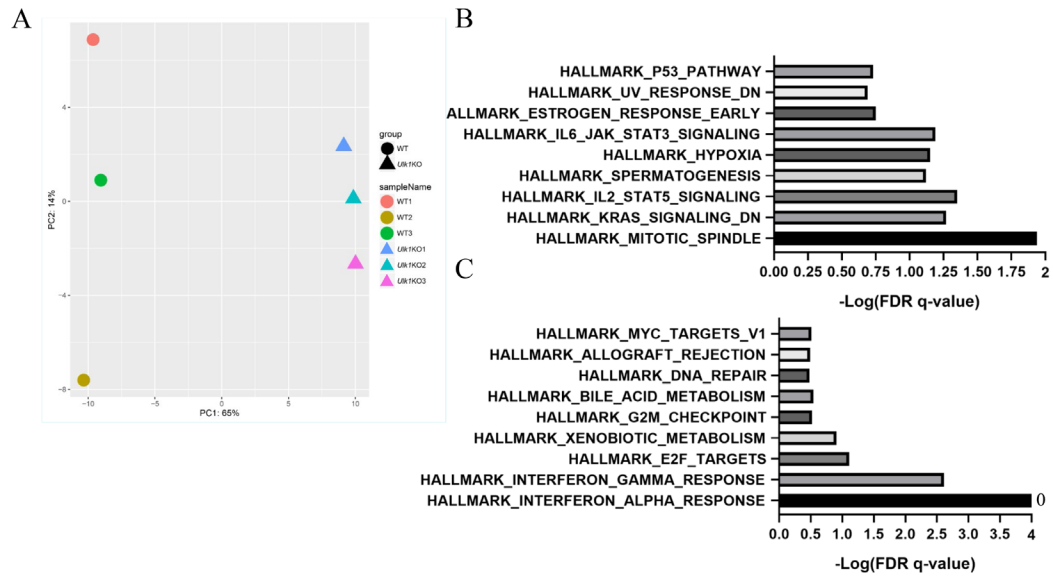

(a) Principal component analysis of gene signatures of each mouse in WT and *Ulk1*KO group. Top ten GSEA pathways of upregulated (b) or downregulated (c) differentially expressed genes in *Ulk1*KO mice versus WT mice.
